# Supplementary material for: Targeting the Interaction between the SH3 Domain of Grb2 and Gab2
Source: PubMed Central journal article supplement (PMC7695167; doi:10.3390/cells9112435), 2020-11-07
Supplement: cells-09-02435-s001.pdf [file cells-09-02435-s001.pdf]

**Targeting the interaction between the SH3 domain of Grb2 and Gab2**

Francesca Malagrino<sup>1</sup>, Antonio Coluccia<sup>2</sup>, Marianna Bufano,<sup>2</sup> Giuseppe La Regina<sup>2</sup>, Michela Puxeddu<sup>2</sup>, Angelo Toto<sup>1</sup>, Lorenzo Visconti<sup>1</sup>, Alessio Paone<sup>1</sup>, Maria Chiara Magnifico<sup>1,3</sup>, Francesca Troilo<sup>1</sup>, Francesca Cutruzzolà<sup>1</sup>, Romano Silvestri<sup>2</sup> and Stefano Gianni<sup>1,\*</sup>

<sup>1</sup> Istituto Pasteur - Fondazione Cenci Bolognetti, Dipartimento di Scienze Biochimiche “A. Rossi Fanelli” and Istituto di Biologia e Patologia Molecolari del CNR, Sapienza Università di Roma, 00185, Rome, Italy;

francesca.malagrino@uniroma1.it (F.M.), angelo.toto@uniroma1.it (A.T.), lorenzo.visconti@uniroma1.it (L.V.), alessio.paone@uniroma1.it (A.P.), francesca.troilo@uniroma1.it (F.T.), francesca.cutruzzola@uniroma1.it (F.C.),

<sup>2</sup> Laboratory affiliated to Istituto Pasteur Italia – Fondazione Cenci Bolognetti, Dipartimento di Chimica e Tecnologie del Farmaco, Sapienza Università di Roma, Piazzale Aldo Moro 5, 00185 Rome, Italy; antonio.coluccia@uniroma1.it (A.C.), marianna.bufano@uniroma1.it (M.B), giuseppe.laregina@uniroma1.it (G.L.R.), michela.puxeddu@uniroma1.it (M.P.), romano.silvestri@uniroma1.it (R.S.).

<sup>3</sup> present address: Department of Biosciences, Biotechnologies and Biopharmaceutics, University of Bari “Aldo Moro”, Via Orabona 4, 70121 Bari, Italy; maria.magnifico@uniba.it.

\* Correspondence: stefano.gianni@uniroma1.it (S.G.)

**Tables of contents**

**1. Figure S1.** Chemical structures of compounds AN-153-I158560, F0526-1467, F2096-1321, F5030-1061, F5139-0164, F6599-2263 and AN-465-J137-985.

**2. Scheme S2.** Chemical synthesis of AN-465-J137-985.

**3. Figure S3.** Equilibrium binding in the presence of different inhibitors.

**4. Figure S4.** Observed displacement time-courses.

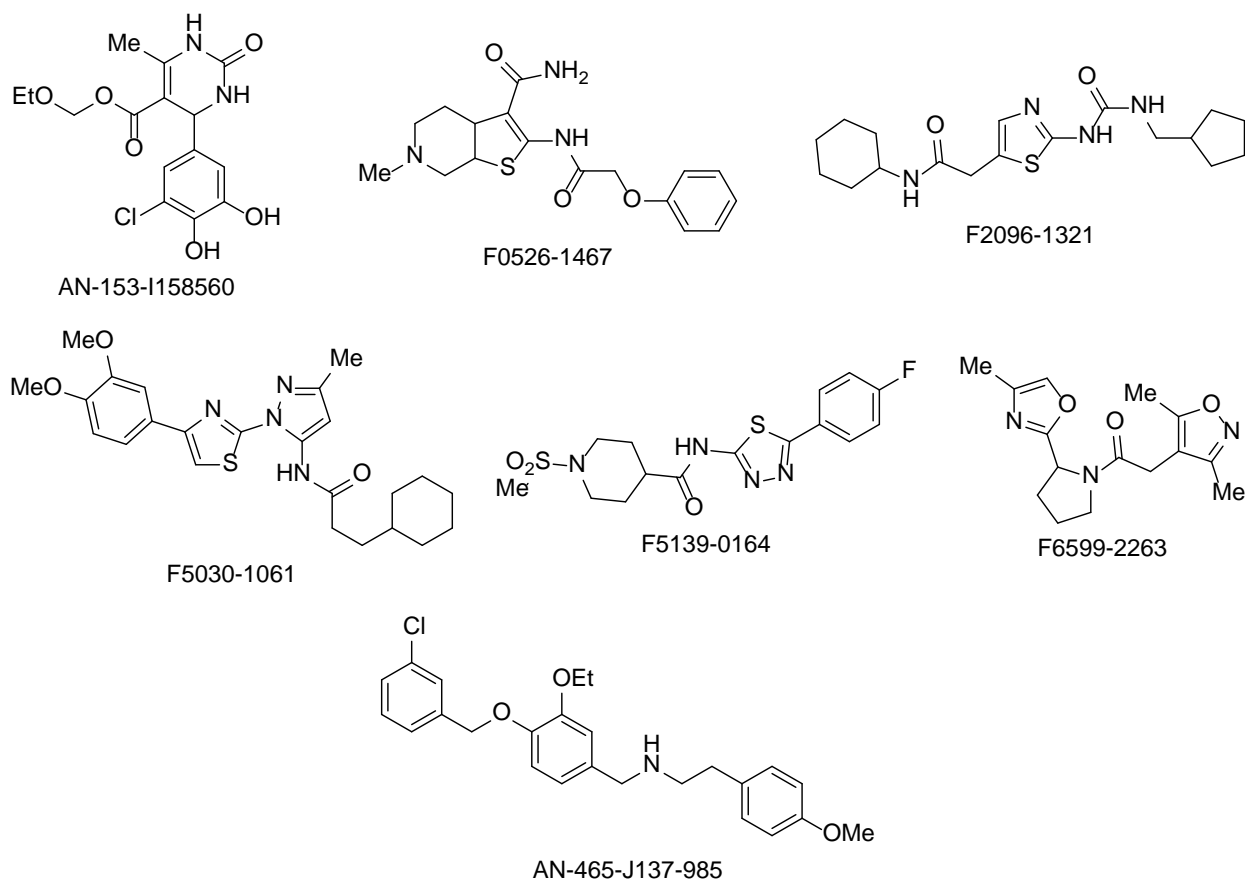

**Figure S1.** Chemical structures of compounds AN-153-I158560, F0526-1467, F2096-1321, F5030-1061, F5139-0164, F6599-2263 and AN-465-J137-985.

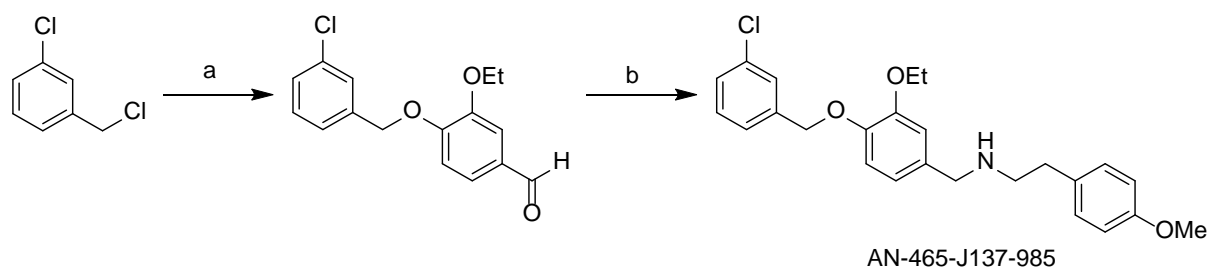

**Scheme S2.** Chemical Synthesis of AN-465-J137-985. Reagents and reaction conditions: (a) 3-ethoxy-4-hydroxybenzaldehyde, cesium carbonate, *N,N*-dimethylformamide, 70 °C, 1 h, argon stream, 97%; (b) (i) 2-(4-methoxyphenyl)ethan-1-amine, methanol, 0 °C, 30 min, then 25 °C, 12 h; (ii) 1N sodium hydroxide aqueous solution, 25 °C, 2 h, 30%.

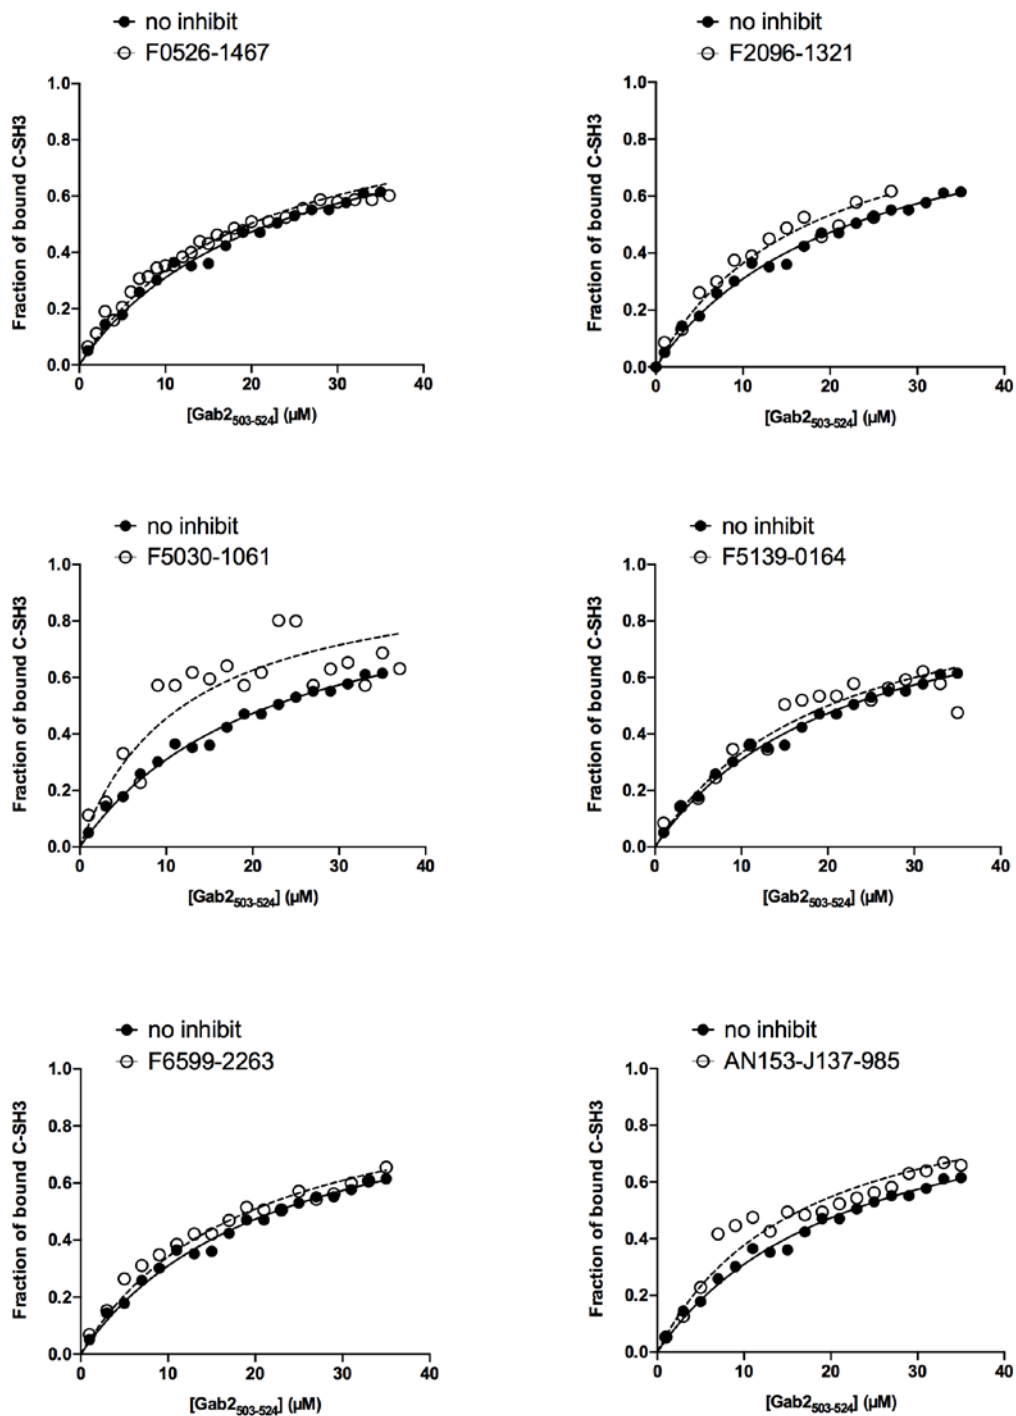

**Figure S3.** Equilibrium binding titration monitored by change in intrinsic fluorescence emission of C-SH3 at different concentrations of Gab2\* in absence (full circles) and in presence of different inhibitors at a constant concentration of 5 μM.

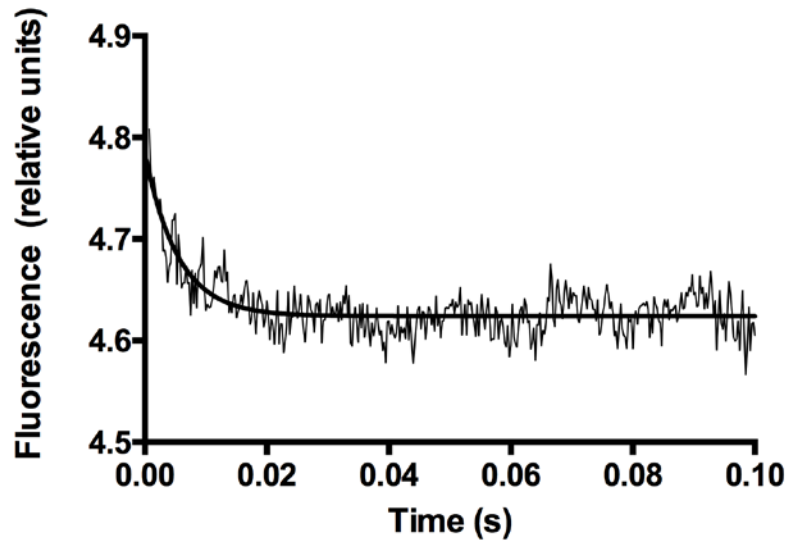

**AN465-J137-985**

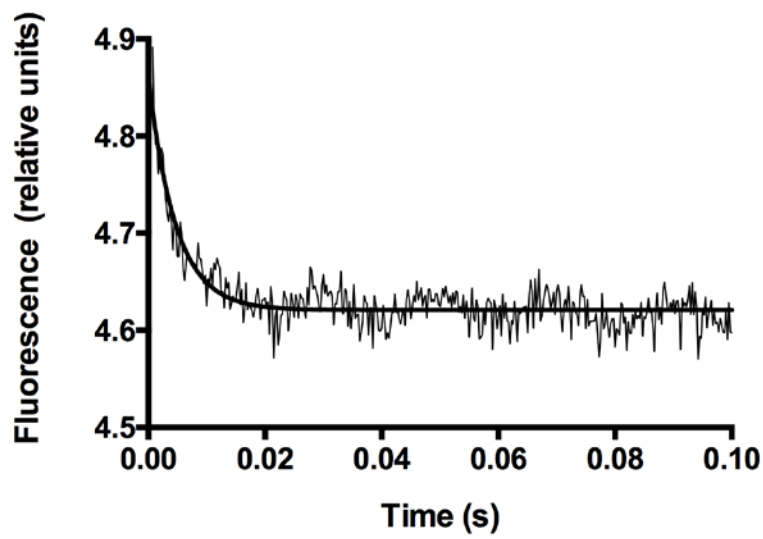

**Figure S4.** Observed displacement time-courses in the absence (top) and in the presence of 5 $\mu$ M AN-465-J137-985 (bottom). The experimental methodology and settings are described in the main text.
